# Supplementary material for: Which Way In? The RalF Arf-GEF Orchestrates Rickettsia Host Cell Invasion
Source: PubMed Central journal article supplement (PMC4546372; doi:10.1371/journal.ppat.1005115), 2015-08-20

#### **S4 Fig. Characteristics of the extended C-terminal domain of *Rickettsia* RalF proteins.**

All alignments were performed using MUSCLE (default parameters) [1]. (A) Sequence alignment of the variable sequence with Pro-rich region (VPR) and T4SS signal sequence (T4S) across select *Rickettsia* species. *Rickettsia* species are organized based on recent estimated phylogeny [2], with classification scheme as follows: red, ancestral group (AG); blue, transitional group (TRG); aquamarine, typhus group (TG); and brown, spotted fever group (SFG). *R. helvetica* and *R. tamurae* (black) are unclassified following recent recommendations [3]. Red circles denote full-length RalF<sub>R</sub> proteins, with NCBI GenBank accession numbers for these proteins provided in S2 Fig. Accession numbers for all other proteins as follows: *Rickettsia canadensis* str. McKiel, YP\_001492434; *R. tamurae*, WP\_032139614; *R. helvetica*, WP\_010423297; *R. akari* str. Hartford, YP\_001493241; REIS (*Rickettsia* endosymbiont of *Ixodes scapularis*), EER21763; *Rickettsia* sp. ISO7, KDO03638; *R. monacensis* str. IrR/Munich, CDI29630; “*Candidatus Rickettsia amblyommii*” str. GAT-30V, YP\_005365253; *R. aeschlimannii*, WP\_032074125; *R. rhipicephali* str. 3-7-female6-CWPP, YP\_005390352; *R. montanensis* str. OSU 85-930, YP\_005392197; “*Candidatus Rickettsia gravesii*”, WP\_017443103; *R. heilongjiangensis* str. 054, YP\_004764228; *R. japonica*, WP\_024704516; *R. honei*, WP\_032850143 and WP\_016916690; *R. philipii* str. 364D, YP\_005300602; *R. rickettsii* str. Brazil, YP\_005292780 and YP\_005292779; *R. slovaca* str. D-CWPP, YP\_005426261, YP\_005426262 and YP\_005426263; *R. conorii* str. Malish 7, NP\_360145 and NP\_360146; *R. parkeri* str. Portsmouth, YP\_005392764; *R. sibirica*, WP\_026054964. Multiple accession numbers for several species denote chimeras comprised of multiple fragments corresponding to the full-length VPR sequences; green highlighting demarcates the boundaries of the individual ORFs within these chimeras, with green dots depicting missing sequence. For several proteins, misaligned terminal residues were stitched back to their respective ends (shown in red), though their homology to these positions is doubtful. Above the alignment, the blue bar depicts the VPR, and the orange bar depicts the T4S. Gray shading illustrates the large deletion within the VPR of RalF proteins from TG rickettsiae. Purple shading depicts the Pro-rich region with the VPR, with Pro residues colored purple. (B) Alignment of the T4S across full-length RalF<sub>R</sub> proteins. Conserved residues are highlighted yellow, with positively charged residues (Arg, His, Lys) colored blue. One conserved positively charged residue (-12 from the C-terminus) is highlighted blue. (C) The T4S does not affect RalF<sub>Rt</sub> localization. HeLa cells expressing YFP tagged RalF<sub>RtCTDΔT4S</sub> (green, described in Fig. 2B) were stained with Alexa Fluor 594 Phalloidin probe to label actin (red). DAPI (blue) is shown in the merged image. Cytoplasmic (C) and membrane (M) localization was confirmed via membrane fractionation of

HEK293T cells Lipofectamine 2000 transfected with the indicated plasmids followed by immunoblotting. Immunoblot: 1, primary Ab, rabbit anti-GFP (Life Technologies); 2, rabbit anti-Calnexin (Abcam); 3, mouse anti-GAPDH (Abcam). (D) Alignment of the C-terminal sequences across select RalF<sub>L</sub> proteins. NCBI GenBank accession numbers for all proteins are provided in **S2 Fig**. For *L. pneumophila* subsp. *pneumophila* str. Philadelphia 1, the Leu residue at position -3 (relative to the C-terminus) is within a black box. This L372 residue has been shown to be critical for RalF translocation via the *dot/icm* T4SS [4]. Unlike the C-terminal sequences of RalF<sub>R</sub> proteins (panel B), the C-terminal sequences of RalF<sub>L</sub> proteins are not conserved, with no other RalF<sub>L</sub> sequences harboring a Leu or other hydrophobic residue at position -3, and only some sequences harboring a hydrophobic residue(s) in the terminal five aa positions (colored orange). (E) The VPR sequences across select *Rickettsia* species contain a predicted coiled-coil motif. Conserved residues are highlighted yellow, with residues within predicted coiled-coil motifs colored green. A consensus coiled-coil motif is depicted at the top of the alignment. Red arrows demarcate the region of the VPR that is absent from TG rickettsiae RalF proteins. Coiled-coil motifs were predicted using the COILS server [5]. (F) Schema depicting the prototypical RalF<sub>R</sub> protein. See text for further details. Alignments provided for the S7D (**S2 Fig**), SCD (**S3 Fig**) and extended C-terminal domain (VPR and T4S) (panel A) provide the delineations of these discrete domains. (G) Breakdown of the amino acid composition within four discrete regions (S7D, SCD, VPR, T4S) for six full-length RalF<sub>R</sub> proteins. Within each region, amino acid frequencies were calculated and grouped into four major categories: non-polar/aliphatic (Ala, Gly, Ile, Leu, Met, Val), polar (Asn, Cys, Gln, Pro, Ser, Thr), aromatic (Phe, Trp, Tyr), positively charged (Arg, His, Lys), and negatively charged (Asp, Glu). While non-polar, proline was considered polar since it is typically solvent-exposed, despite having an aliphatic side chain.

## References

1. Edgar RC. MUSCLE: Multiple sequence alignment with high accuracy and high throughput. *Nucleic Acids Res.* 2004;32: 1792–1797. doi:10.1093/nar/gkh340
2. Gillespie JJ, Kaur SJ, Rahman MS, Rennoll-Bankert K, Sears KT, Beier-Sexton M, et al. Secretome of obligate intracellular *Rickettsia*. *FEMS Microbiol Rev.* 2014; 1–44. doi:10.1111/1574-6976.12084
3. Driscoll T, Gillespie JJ, Nordberg EK, Azad AF, Sobral BW. Bacterial DNA sifted from the *Trichoplax adhaerens* (Animalia: Placozoa) genome project reveals a putative rickettsial endosymbiont. *Genome Biol Evol.* 2013;5: 621–45. doi:10.1093/gbe/evt036

4. Nagai H, Cambronne ED, Kagan JC, Amor JC, Kahn RA, Roy CR. A C-terminal translocation signal required for Dot/Icm-dependent delivery of the *Legionella* RalF protein to host cells. Proc Natl Acad Sci U S A. 2005;102: 826–831. doi:10.1073/pnas.0406239101
5. Lupas A, Van Dyke M, Stock J. Predicting coiled coils from protein sequences. Science. 1991;252: 1162–4. doi:10.1126/science.252.5009.1162







D

*L. shakespeare* ----EQI--PRESQPEIGNINTPRO-----  
*L. moravica* STWKSEI--GEEREAIKQDSSQRTOMQLK-----  
*L. p. p. Philadelphia 1* ----EGV--PKDPDAEMQKEKGRQMKF-----  
*L. p. Corby* ----GAM--FRTPNAEQQETS KSA TKLNTDYDINEDTETIKDESKSSYK  
*L. p. Lens* ----GSI--FRTPNAEQRETS KSA TRVTNTDYDINEDTVTRKDESRSSYK  
*L. p. Paris* ----GSM--FRKPNAEQQETS KSA TRTLNTDYDINEDTVTRKDESRSSYK  
*L. p. Leg01/11* ----GSM--FRKPNAEQQETS KSA TRTLNTDYDINEDTVTRKDESRSSYK  
*L. longbeachae* NSW150 ----EKLRFQRPCSEDNKEELMKSNGLK-----  
*L. sainthelensi* ----EKLRFQRPSEKENTQEELMKANELKNHN-----  
 :

E

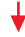

|                                         |                                                               |
|-----------------------------------------|---------------------------------------------------------------|
| ● <i>R. bellii</i> RML369-C             | HNKIK---ETTAKVQQADPEIIPDTKSIPLASETNFQDLKEAETIGIQPAK-----TQPVE |
| ● <i>R. bellii</i> OSU 85-389           | HNKIK---ETTAKVQQADPEIIPDTKSIPLASETNFQDLKEAETIGIQPAK-----TQPVE |
| ● <i>R. australis</i> Cutlack           | HKNIK---EITAIVQQTNQOIQPE---KPLASKESFEDLTQAEIGIKPVEILIKSSSQPVE |
| ● <i>R. akari</i> Hartford              | HKNIK---EITEIVQQTNQOIQPE---KPLASKEIFEDLTQAEIGIKPVEILIKSSYQOVK |
| ● <i>R. felis</i> URRWXCal2             | HKNIK---EITEIVQQTNQOIQPE---KPLASKESFEDLTQAEIGIKPVEILIKSSSQPVE |
| <i>R. monacensis</i> IrR/Munich         | HKNIQ---EITKDLRKHDQPIPDTSKKPLASRENFEDLIHSDLG-KPVR-----SKPL-   |
| <i>R. aeschlimannii</i>                 | HKNIQ---EITKDLRKHDQPTPDTSKKPLASRENFEDLIHSDLG-KPVR-----NKPL-   |
| <i>R. rhipicephali</i> 3-7-female6-CWPP | HKNIQ---EITKDLRKHDQPIPDTSKKPLASRENFEDLIHSDLG-KPVR-----NKPL-   |
| <i>R. montanensis</i> OSU 85-930        | HKNIQ---EITKDLRKHDQPIPDTSKKPLASRENFEDLIHSDLG-KPVR-----NKPL-   |
| Candidatus <i>R. gravesii</i>           | HKNIQ---EITKDLRKHDQPIPDTSKKPLASRENFEDLIHSDLG-KPVR-----NKPL-   |
| <i>R. heilongjiangensis</i> 054         | NKNIQ---EITKGLRKHDQPIPDGKPLASRENFDDLHSDLG-QPVR-----NKPL-      |
| <i>R. japonica</i>                      | NKNIQ---EITKGLRKHDQPIPDTSKKLLASRENFDDLHSDLG-QPVR-----NEPL-    |

\*\*\*: \* \* : : : \* : \* \* \* \* : : \* : : \* : \* : : \* : \* : : \*

CCCCCCCCCCCCCCCCCCCCCCCC

|                                         |                                                               |
|-----------------------------------------|---------------------------------------------------------------|
| ● <i>R. bellii</i> RML369-C             | KPKFNTPAEELAWRNAQKKQAIIDTPVTKNEEPKAQIDNHKKRLEELKQKQEDLENKKKEL |
| ● <i>R. bellii</i> OSU 85-389           | KPKFNTLVEELAWRNAQKKQAIIDTPVTKNEEPKAQIDNHKKRLEELKQKQEDLENKKKEL |
| ● <i>R. australis</i> Cutlack           | KPKFNSFIEELAWKSVQRKQNIIDTPISQNKPKIQTDNHAKILEELKQKQKEDLKKKGL   |
| ● <i>R. akari</i> Hartford              | KPKFNSFIEELAWKSAQRKQNVDTPIQNKPKIQTDNHAKVLEELKQKQKEDLKKKGL     |
| ● <i>R. felis</i> URRWXCal2             | KPKFNSFIEELAWKNAQRKQNIIDTPISQNKPKIQTDNHAKILEELKQKQKEDLKKKGL   |
| <i>R. monacensis</i> IrR/Munich         | ----SFDEELK-KKVQSRQVKSSEQQTKITEEKIDNHAKRIEELKQKQKEDLDRKGL     |
| <i>R. aeschlimannii</i>                 | ----AFDEELK-KKVQSRQVKSSEQQTKITEEKIDNHAKRIEELKQKQKEDLDRKGL     |
| <i>R. rhipicephali</i> 3-7-female6-CWPP | ----AFDEELK-KKVQSRQVKSSEQQTKITEEKIDNHAKRIEELKQKQKEDLDRKGL     |
| <i>R. montanensis</i> OSU 85-930        | ----SFDEELK-KKVQSRQVKSSEQQTKITEEKIDNHAKRIEELKQKQKEDLDRKGL     |
| Candidatus <i>R. gravesii</i>           | ----SFDEELK-KKVQSRQVKSSEQQTKITEEKIDNHAKRIEELKQKQKEDLDRKGL     |
| <i>R. heilongjiangensis</i> 054         | ----SFDEELK-KKVQSRQVKSSEQQTKITEEKIDNHAKRIEELKQKQKEDLDRKGL     |
| <i>R. japonica</i>                      | ----SFDEELK-KVQSRQVKSSEQQTKITEEKIDNHAKRIEELKQKQKEDLDRKGL      |

: \* \* \* . . . \* . \* : : . : : \* \* : \* : \* \* \* \* \* : \* : \* \* \* \* \*

CCCCCCCC

|                                         |                                                              |
|-----------------------------------------|--------------------------------------------------------------|
| ● <i>R. bellii</i> RML369-C             | EEKKANSNITKEEKWRIVAELEGVTKHLESIKKEHNTINTAEREKQF-NKSSQSSALKG  |
| ● <i>R. bellii</i> OSU 85-389           | EEKKANSNITKEEKWRIVAELEGVTKHLESIKKEHNTINTAEREKQF-NKSSQSSALKG  |
| ● <i>R. australis</i> Cutlack           | EEKKANSNITREERWKIVAELESINNQFKAIEKYVNTINSAADREKKFDNKNNPASPTKG |
| ● <i>R. akari</i> Hartford              | EEKKANSNITREERWKIVAELESINNQFKAIEKEYNINSASDREKKFDNKNNPSSPTKG  |
| ● <i>R. felis</i> URRWXCal2             | EEKKANSNITREERWKIVAELESINNQFKAIEKERSNINSASDREKKFDNKNNPSSPTKG |
| <i>R. monacensis</i> IrR/Munich         | EEKKANSNITREERWKIVAELEANNQFKAIEKEHNTINSASDREKKFDNKNKHLTSTKR  |
| <i>R. aeschlimannii</i>                 | EEKKANSNITREERWKIAAELEANNQFKAIEKEHNTINSASDREKKFDNKNKHLTSTKR  |
| <i>R. rhipicephali</i> 3-7-female6-CWPP | EEKKANSNITREERWKIAAELEANNQFKAIEKEHNTINSASDREKKFDNKNKHLTSTKR  |
| <i>R. montanensis</i> OSU 85-930        | EEKKANSNITREARWKIAAELEANNQFKAIEKEHNTINSASDREKKFDNKNKHLTSTKR  |
| Candidatus <i>R. gravesii</i>           | EEKKANSNITRDERWKIAAELEANNQFKAIEKEHNTINSASDREKKFDNKNKHLTSTKR  |
| <i>R. heilongjiangensis</i> 054         | EEKKANSNITREERWKIAAELEANNQFKAIEKEHNTINSASDREKQFDNKNKYLSTTKR  |
| <i>R. japonica</i>                      | EEKKANSNITREERWKIAAELEANNQFKAIEKEHNTINSASDREKQFDNKNKYLSTTKR  |

\*\*\*\*:\*\*\*\*\*: .\*.\*\*\*\*\*: : : : : : \* . \* \* \* : \* \* \* \* \* \* \* . . . \* \*

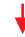

|                                         |                                     |
|-----------------------------------------|-------------------------------------|
| ● <i>R. bellii</i> RML369-C             | EPTAADKQQQAAMELIRLRKEQRLQKEAASKAIIA |
| ● <i>R. bellii</i> OSU 85-389           | EPTAADKQQQAAMELIR-LRKQRLQEEAASKAIIA |
| ● <i>R. australis</i> Cutlack           | EPTAADLQQQALAAIKRMKEEKIKQQQA-EAVNQ  |
| ● <i>R. akari</i> Hartford              | APTAAADLQQQALAAIKRMKEEKIKQQQA-EAANQ |
| ● <i>R. felis</i> URRWXCal2             | EPTAADLQQQALAAIKRMKEEKIKQQQA-EATNQ  |
| <i>R. monacensis</i> IrR/Munich         | EPTAADLQQQALAVIKRMKEEKIKQQQA-EAVNQ  |
| <i>R. aeschlimannii</i>                 | EPTAADLQQQALAAIKRMKEEKIKQQQA-EVVNQ  |
| <i>R. rhipicephali</i> 3-7-female6-CWPP | EPTAADLQQQALAAIKRVKEEKIKQQQA-EAVNQ  |
| <i>R. montanensis</i> OSU 85-930        | EPVAADLQQQALAAIKRMKEEKIKQQQA-EAVNQ  |
| Candidatus <i>R. gravesii</i>           | EPTAADLQQQALAAIKRMKEEKIKQQQA-EAVNQ  |
| <i>R. heilongjiangensis</i> 054         | EPTAADLQQQALAAIKRMKEEKIKQQQA-EAVNQ  |
| <i>R. japonica</i>                      | EPTAADLQQQALAAIKRMKEEKIKQQQA-EAVNQ  |

\*.\*\*\* \*\*\*: \* . . . : : : \* \* \*

**F**

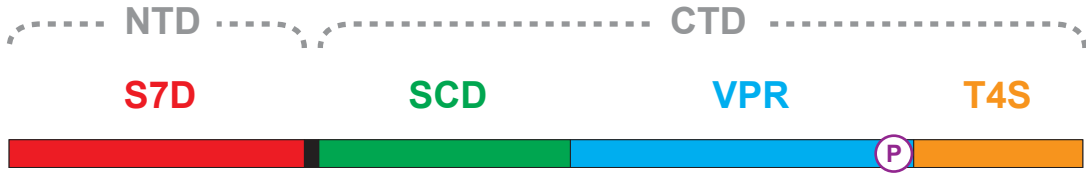

**G**

*R. bellii* str. RML369-C

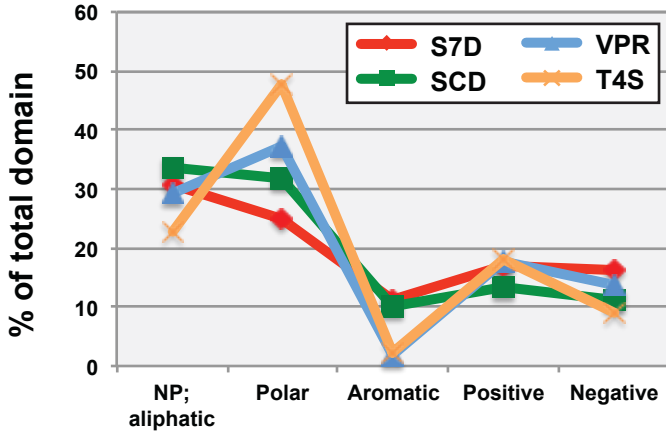

*R. typhi* str. Wilmington

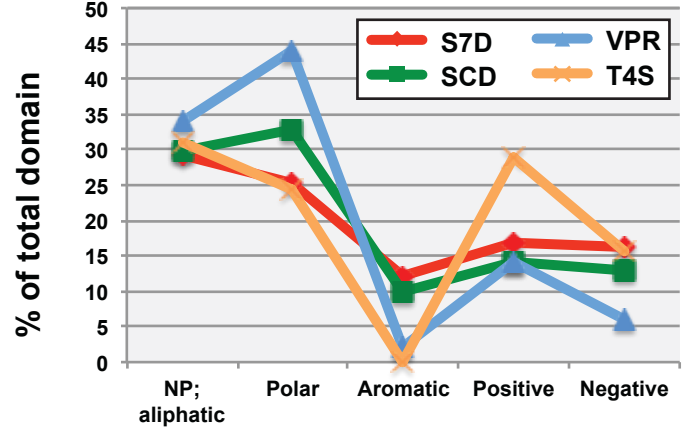

*R. prowazekii* str. Madrid E

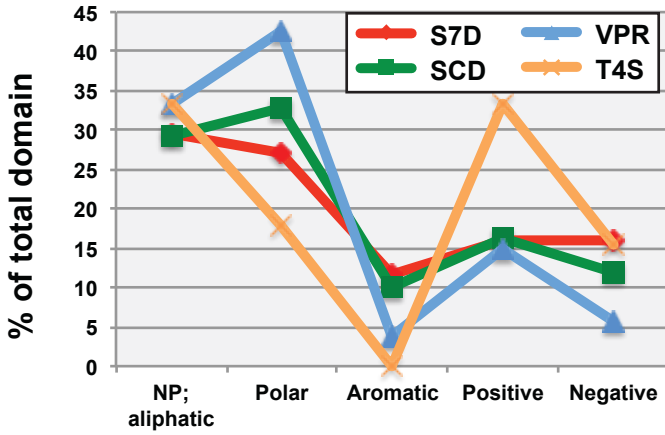

*R. felis* str. URRWXCa12

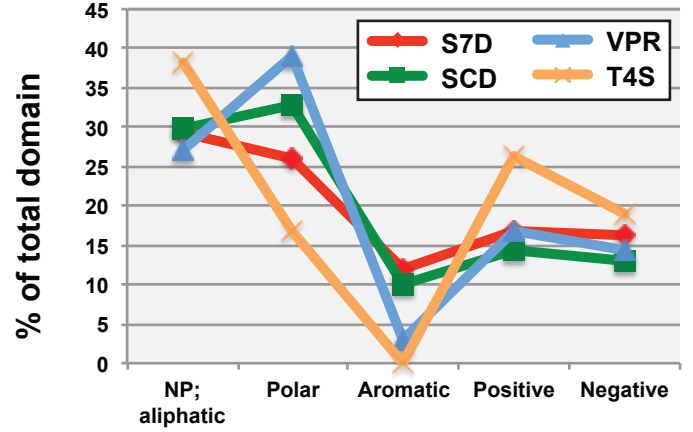

*R. akari* str. Hartford

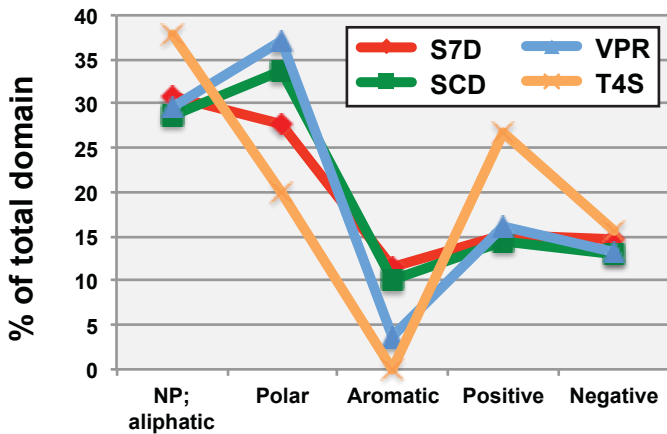

*R. australis* str. Cutlack

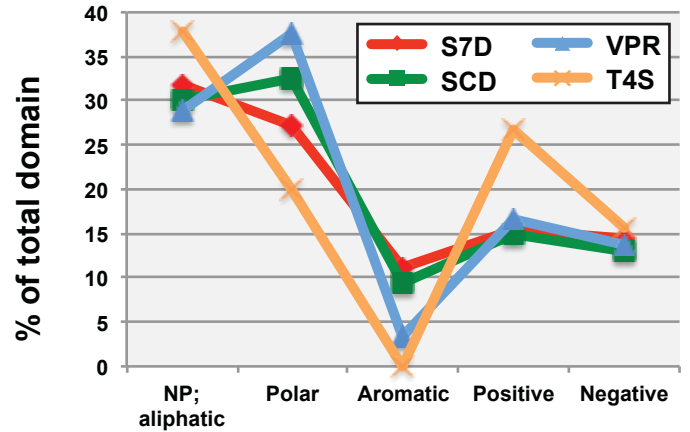

Supplement: ppat.1005115.s004.pdf [file ppat.1005115.s004.pdf]
