# Supplementary material for: Which Way In? The RalF Arf-GEF Orchestrates Rickettsia Host Cell Invasion
Source: PLoS Pathog. 2015 Aug 20;11(8):e1005115. doi: 10.1371/journal.ppat.1005115 (PMC4546372; doi:10.1371/journal.ppat.1005115)

**S7 Fig. Subcellular localization of rickettsial RalF proteins to Golgi apparatus.**

HeLa cells expressing YFP tagged RalF proteins (green, described in [Fig 2B](#)) were fixed and the Golgi apparatus detected with mouse anti-GM130 and Alexa Fluor 594 anti-mouse antibodies. DAPI (blue) is shown in the merged image. (Scale bar: 10  $\mu$ m)

**GM130****YFP****Merge****pEYFP-C1**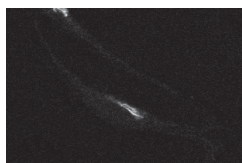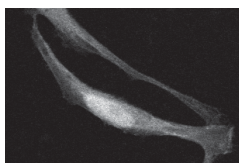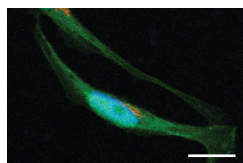**Rt FL**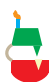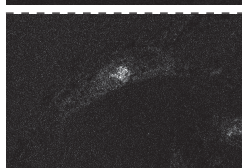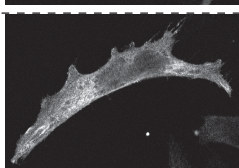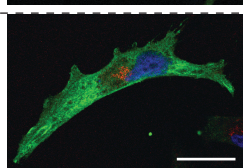**Rt CTD**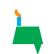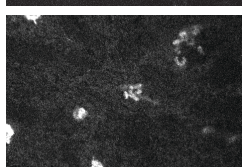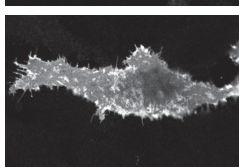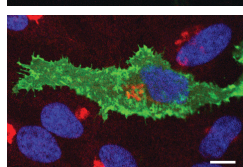**Rt VPR**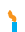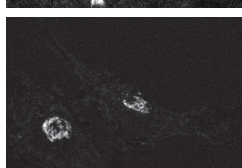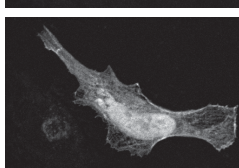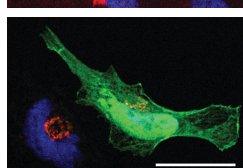**Rf FL**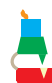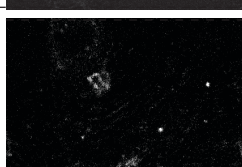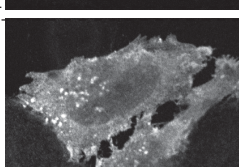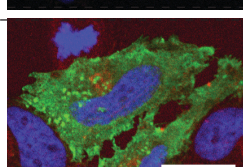**Rf CTD**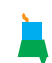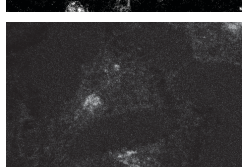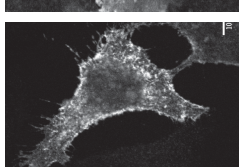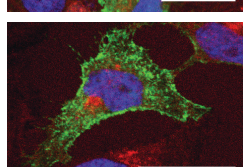**Rf VPR**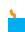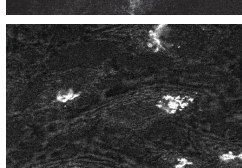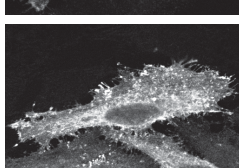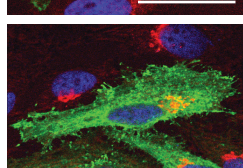**Rm FL**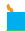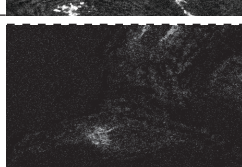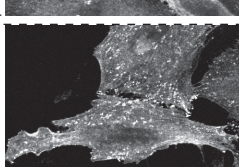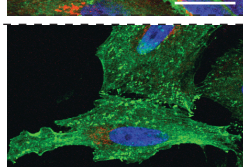**Rb FL**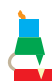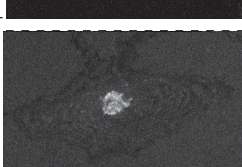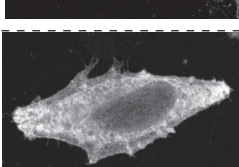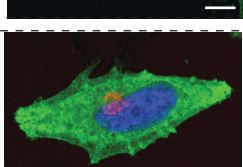**Rb CTD**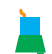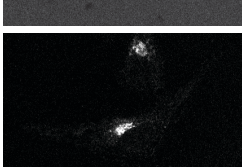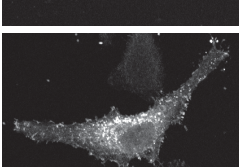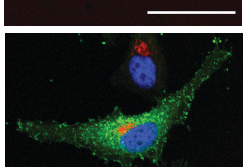**Rb VPR**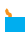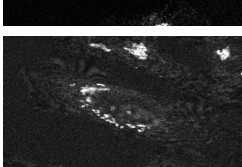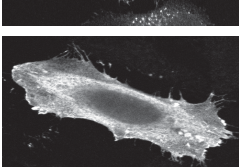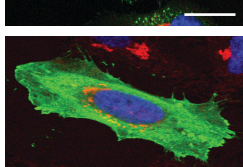

Supplement: S7 Fig — (PDF) [file ppat.1005115.s007.pdf]
