# Supplementary material for: Which Way In? The RalF Arf-GEF Orchestrates Rickettsia Host Cell Invasion
Source: PubMed Central journal article supplement (PMC4546372; doi:10.1371/journal.ppat.1005115), 2015-08-20

**S1 Fig. Qualification of anti-RalF<sub>Rt</sub> antibody.** Expression of endogenous RalF<sub>Rt</sub>. Immunoblot with (left) rabbit pre-immune serum, (center) Melon Gel IgG (Thermo Scientific) purified anti-RalF<sub>Rt</sub> antibody or (right) affinity purified anti-RalF<sub>Rt</sub> antibody. M, marker; Lanes 2 and 4, *R. typhi* 48 hr infected Vero76 whole lysate; Lanes 3 and 5, Vero76 whole lysate; Lane 6, *R. typhi* 48 hr infected HeLa lysate; Lane 7, HeLa whole lysate. Arrow indicates RalF<sub>Rt</sub> predicted size.

RaIF: 454 aa

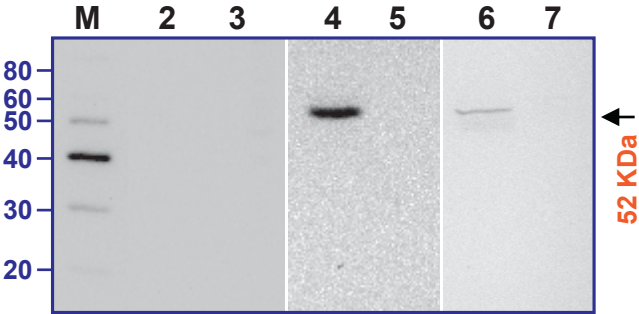

Supplement: ppat.1005115.s001.pdf [file ppat.1005115.s001.pdf]
