# Supplementary material for: Which Way In? The RalF Arf-GEF Orchestrates Rickettsia Host Cell Invasion
Source: PubMed Central journal article supplement (PMC4546372; doi:10.1371/journal.ppat.1005115), 2015-08-20

**S6 Fig. Densitometry analysis of membrane fractionation.** Image J was used to perform densitometry analysis of anti-GFP and anti-GAPDH protein immunoblots (**Fig 3**). Arbitrary units for GFP intensity was normalized to GAPDH intensity and the percent of cytoplasmic and membrane association for each protein was calculated. Mean  $\pm$  SEM of two independent analyses are plotted.

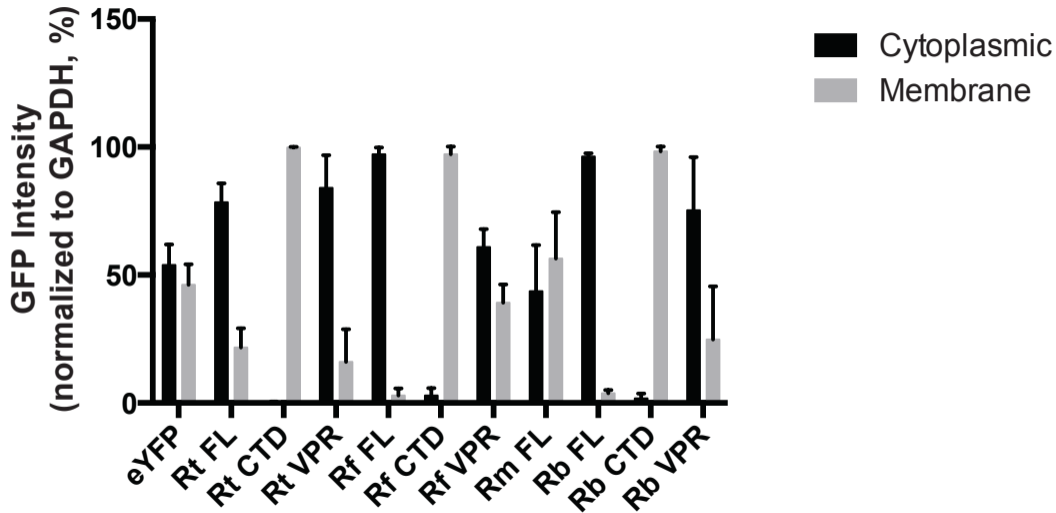

Supplement: ppat.1005115.s006.pdf [file ppat.1005115.s006.pdf]
