# Supplementary material for: Which Way In? The RalF Arf-GEF Orchestrates Rickettsia Host Cell Invasion
Source: PubMed Central journal article supplement (PMC4546372; doi:10.1371/journal.ppat.1005115), 2015-08-20

**S8 Fig. Quantification of rickettsial RaIF proteins co-localization with plasma membrane, endoplasmic reticulum and Golgi apparatus.** Pearson's correlation coefficients for measuring co-localization of RaIF proteins with WGA (A), PDI (B), or GM130 (C), markers of the plasma membrane, endoplasmic reticulum and Golgi apparatus, respectively. Five to ten cells per condition from two independent experiments were analyzed using the CoLoc2 plugin in the ImageJ software program and mean Pearson's correlation coefficients  $\pm$  SEM is plotted. (\*  $P < 0.05$  compared with eYFP control, two-tailed Student's t-test)

**A**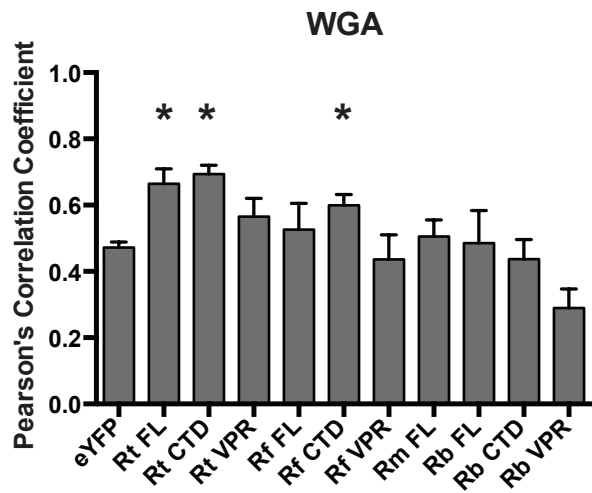**B**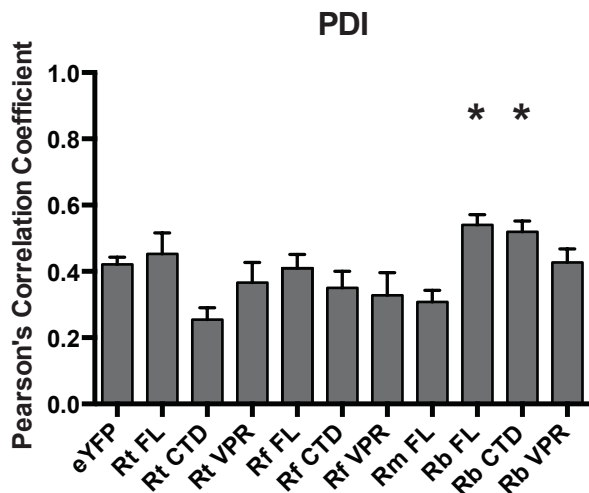**C**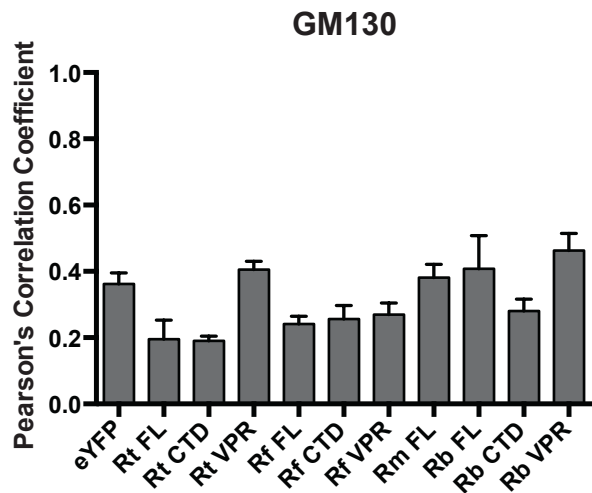

Supplement: ppat.1005115.s008.pdf [file ppat.1005115.s008.pdf]
