# Supplementary material for: Which Way In? The RalF Arf-GEF Orchestrates Rickettsia Host Cell Invasion
Source: PubMed Central journal article supplement (PMC4546372; doi:10.1371/journal.ppat.1005115), 2015-08-20

**S9 Fig. Arf1 does not co-localize with RalF<sub>R</sub>.** HeLa cells co-expressing EYFP, EYFP-RalF<sub>RIFL</sub> or EYFP-RalF<sub>RbFL</sub> and mRFP-Arf1 were fixed with 4% para-formaldehyde. Nuclei were stained with DAPI (blue). (Scale bar: 10 μm)

Arf1

YFP

Merge

pEYFP

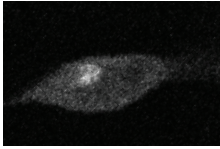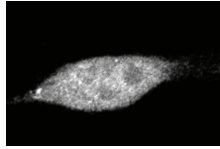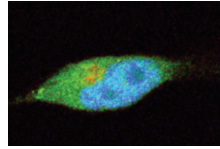

Rt FL

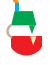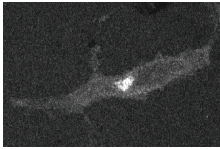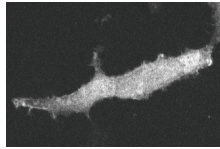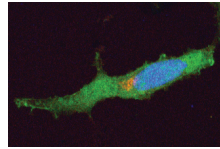

Rb FL

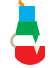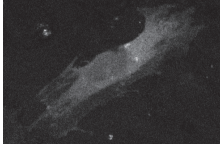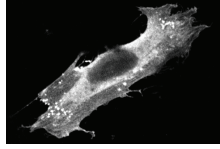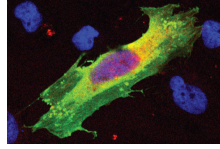

Supplement: ppat.1005115.s009.pdf [file ppat.1005115.s009.pdf]
