# Supplementary material for: Which Way In? The RalF Arf-GEF Orchestrates Rickettsia Host Cell Invasion
Source: PubMed Central journal article supplement (PMC4546372; doi:10.1371/journal.ppat.1005115), 2015-08-20
Supplement: ppat.1005115.s010.pdf [file ppat.1005115.s010.pdf]

Table S1. Primers used for this study.

| Construct                       | Forward Primer (5'-3')                                     | Reverse Primer (5'-3')                       |
|---------------------------------|------------------------------------------------------------|----------------------------------------------|
| pTRG-RalF <sub>RtFL</sub>       | GCGGCCGCCATGGATTCATTACTAAAAACG                             | CTCGAGTTATACTACTCTCCCTGAATTTTGC              |
| pTRG-RalF <sub>RtΔT4S</sub>     | GCGGCCGCCATGGATTCATTACTAAAAACG                             | CTCGAGTGGAAATTGATTTAGGAAGTGGTAA              |
| pBT- coRvhD4                    | GCGGCCGCCATGGAATGGCATAAAATCCTG                             | CTCGAGTTCATTGTTTTCAATTGCGGTG                 |
| pTrcHisA-RalF                   | GGATCCATGGATTCATTACTAAAAACGAA                              | GAATTCTTATACTACTCTCCCTGAATTTTGC              |
| pEYFP-RalF <sub>RtFL</sub>      | GAATTCTATGGATTCATTACTAAAAACG                               | GGATCCTTATACTACTCTCCCTGAATTTTGCCTTGTC        |
| pEYFP-RalF <sub>RtCTD</sub>     | GAATTCTCATAAAAATATTTAAAACAGAAGTTGTATATCA<br>AATAAATC       | GGATCCTTATACTACTCTCCCTGAATTTTGCCTTGTC        |
| pEYFP-RalF <sub>RtVPR</sub>     | GAATTCTCATAAAAATATTTAAAACAGAAGTTGTATATCA<br>AATAAATC       | GGATCCTTATACTACTCTCCCTGAATTTTGCCTTGTC        |
| pEYFP-RalF <sub>RtCTDΔT4S</sub> | GAATTCTCATAAAAATATTTAAAACAGAAGTTGTATATCA<br>AATAAATC       | GGATCCTTATGGAATTGATTTAGGAAGTGGTAATGG         |
| pEYFP-RalF <sub>RtFL</sub>      | TCGAATTCTATGGACTCATTAG                                     | GGATCCCTACATTCCTCTACC                        |
| pEYFP-RalF <sub>RtCTD</sub>     | TCGAATTCTCCTGGTTATGAGATAG                                  | GGATCCCTACATTCCTCTACC                        |
| pEYFP-RalF <sub>RtVPR</sub>     | GAATTCTCATAAAAATATTTAAAGAAATTACAGAAATTGT<br>ACAGCAAAC      | GGATCCCTACATTCCTCTACC                        |
| pEYFP-RalF <sub>RmFL</sub>      | TCGAATTCTATGGCGCCGATTATAG                                  | GGATCCTCATATTCCTAAGTTTTGC                    |
| pEYFP-RalF <sub>RbFL</sub>      | CTCAAGCTTCGAATTCTATGGATCCGTTAATAAAAAGAG<br>AAGTAATAAGTTCCT | TAGATCCGGTGGATCCCTAACGTGTTGGGCTATTTCTC<br>CT |
| pEYFP-RalF <sub>RbCTD</sub>     | GAATTCTACTGGTTATGAAATAGCC                                  | GGATCCCTAACGTGTTGGGCTATTTCT                  |
| pEYFP-RalF <sub>RbVPR</sub>     | GAATTCTCATAATAAAAATAAAAGAAACTAC                            | GGATCCCTAACGTGTTGGGCTATTTCT                  |
